# Supplementary material for: Metagenomic views of microbial communities in sand sediments associated with coral reefs
Source: Research Square preprint supplement (doi:10.21203/rs.3.rs-767957/v1), 2021-08-13
Supplement: Supplementary file 1 [file 1864788d9e043807ae70becb.xlsx]

## Sheet: Table S9
from	to	value
c__Vicinamibacteria	AAC(3)-IV	1
c__Saccharimonadia	RPOB2	1
c__Planctomycetes	MEXF	1
c__Gemmatimonadetes	TRUNCATED_PUTATIVE_RESPONSE_REGULATOR_ARLR	1
c__Gammaproteobacteria	CAMP-REGULATORY_PROTEIN	47
c__Gammaproteobacteria	TRANSCRIPTIONAL_REGULATORY_PROTEIN_CPXR_CPXR	4
c__Gammaproteobacteria	KASUGAMYCIN_RESISTANCE_PROTEIN_KSGA	9
c__Gammaproteobacteria	TRUNCATED_PUTATIVE_RESPONSE_REGULATOR_ARLR	1
c__Gammaproteobacteria	AAC(3)-I	6
c__Gammaproteobacteria	COB(I)ALAMIN_ADENOLSYLTRANSFERASE	3
c__Gammaproteobacteria	ABES	2
c__Gammaproteobacteria	QACH	2
c__Gammaproteobacteria	BAER	5
c__Gammaproteobacteria	AAC(6')-I	1
c__Gammaproteobacteria	OMPR	4
c__Gammaproteobacteria	SMER	3
c__Gammaproteobacteria	RPOB2	2
c__Desulfobulbia	RPOB2	2
c__Desulfobulbia	SMER	1
c__Desulfobacteria	TRUNCATED_PUTATIVE_RESPONSE_REGULATOR_ARLR	1
c__Desulfobacteria	BAER	2
c__Desulfobacteria	MEXF	1
c__Desulfobacteria	FOSX	1
c__Cyanobacteriia	RPOB2	1
c__Coriobacteriia	AAC(6')-I	1
c__Blastocatellia	TRANSCRIPTIONAL_REGULATORY_PROTEIN_CPXR_CPXR	1
c__Bacteroidia	FOSX	1
c__Bacilli	UGD	2
c__Anaerolineae	EFRB	2
c__Alphaproteobacteria	ROSB	4
c__Alphaproteobacteria	AAC(6')-I	1
c__Alphaproteobacteria	ROSA	2
c__Alphaproteobacteria	CEOB	1
c__Alphaproteobacteria	MEXD	3
c__Alphaproteobacteria	SUL2	1
c__Alphaproteobacteria	AAC(3)-IV	1
c__Alphaproteobacteria	GOLS	4
c__Alphaproteobacteria	TET34	2
c__Alphaproteobacteria	OMPR	6
c__Alphaproteobacteria	FOSA	1
c__Alphaproteobacteria	ABES	1
c__Alphaproteobacteria	RPOB2	4
c__Alphaproteobacteria	MEXF	6
c__Alphaproteobacteria	AAC(3)-I	2
c__Alphaproteobacteria	UGD	2
c__Alphaproteobacteria	ADEB	1
c__Alphaproteobacteria	MEXC	1
c__Alphaproteobacteria	MEXE	1
c__Alphaproteobacteria	MEXQ	1
c__Alphaproteobacteria	ACRB	1
c__Alphaproteobacteria	ADER	1
c__Acidobacteriae	AAC(3)-IV	1
c__Acidimicrobiia	TRUNCATED_PUTATIVE_RESPONSE_REGULATOR_ARLR	10
c__Acidimicrobiia	TETA(48)	14
c__Acidimicrobiia	QACG	1
c__Acidimicrobiia	RPOB2	4
c__Acidimicrobiia	EFRB	1
